# Supplementary material
Source: publisher figshare collection journal article supplement (https://acs.figshare.com/ndownloader/files/6452559)
Supplement: Supplementary file 1 [file 6452559]

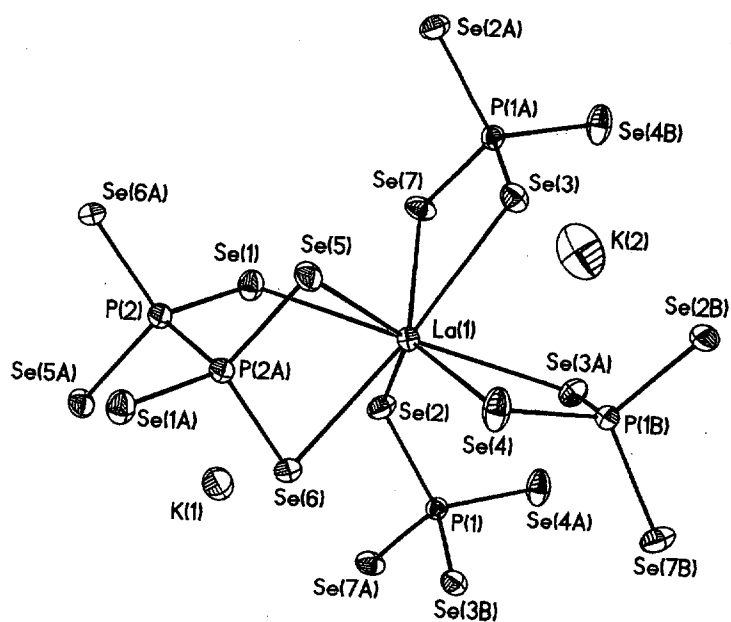

**Figure S1.** ORTEP plot of  $K_2LaP_2Se_7$ . Thermal ellipsoids are plotted at the 50% probability level.

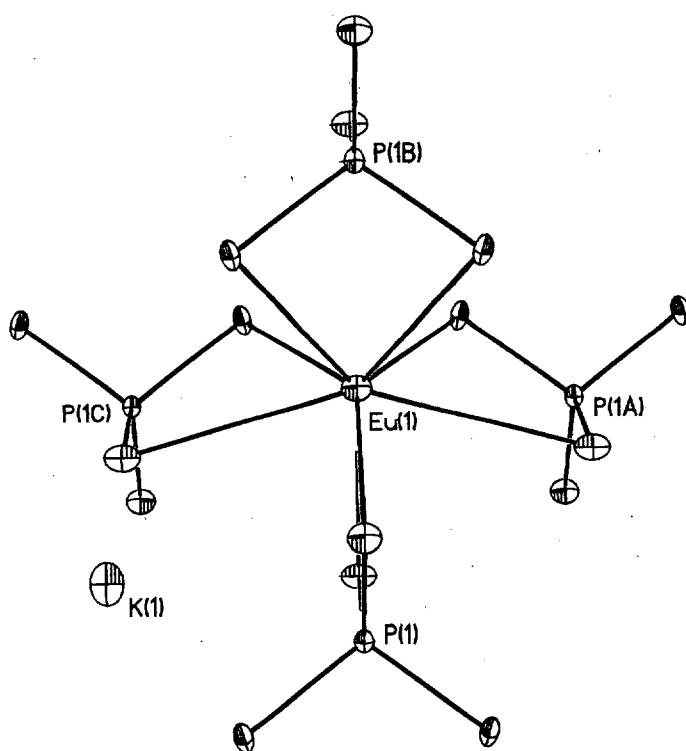

**Figure S2.** ORTEP plot of  $\text{KEuPSe}_4$ . Thermal ellipsoids are plotted at the 50% probability level.
